# Supplementary material for: Solid-phase reverse transfection for intracellular delivery of functionally active proteins
Source: HighWire-hosted journal article supplement (doi:10.1101/gr.215103.116), 2017-09-05
Supplement: Supplemental_Fig_S1.pdf [file Supplemental_Fig_S1.pdf]

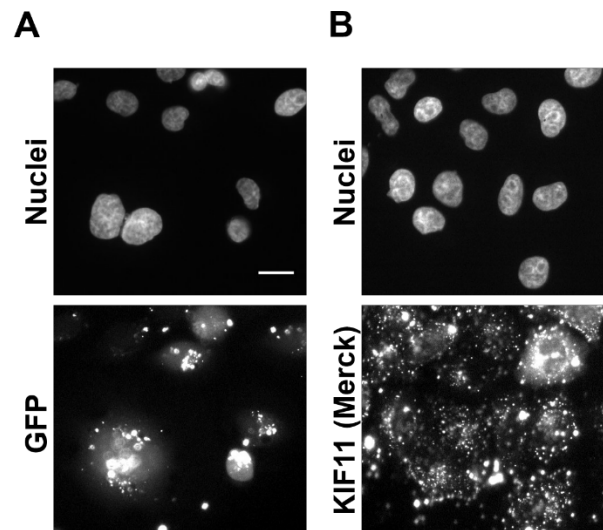

**Supplemental Figure S1** Suboptimal conditions of solid-phase reverse protein transfection. (A) Transfection of GFP with the condition VIII and Lipofectamine®RNAiMAX (Supplemental Table S1). Cells were fixed 24 hours post transfection. (B) Transfection of Alexa Fluor® 647 labeled anti-KIF11 antibody with the condition IV and Lipofectamine®RNAiMAX (Supplemental Table S1). Cells were trypsinized 2 hours post transfection, seeded to a mock-coated 384-well plate and fixed after another 4 hours of incubation. The transfection in (A) and (B) was performed in 384-multiwell plates using HeLa cells. Nuclei were counterstained with Hoechst 33342 dye. Scale bar: 20  $\mu$ m.
