# Supplementary material for: Solid-phase reverse transfection for intracellular delivery of functionally active proteins
Source: HighWire-hosted journal article supplement (doi:10.1101/gr.215103.116), 2017-09-05
Supplement: Supplemental_Fig_S2.pdf [file Supplemental_Fig_S2.pdf]

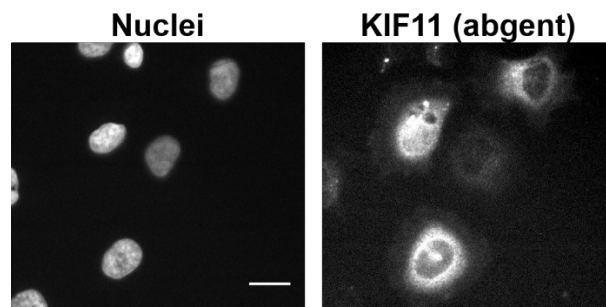

**Supplemental Figure S2** Solid-phase reverse transfection of anti-KIF11 antibody in HeLa cells. Transfection condition VIII using Lipofectamine®RNAiMAX (Supplemental Table S1) was used. The transfection was performed in 384-well plates. Cells were trypsinized 2 hours post transfection, seeded to a mock-coated 384-well plate and fixed after another 4 hours of incubation. Nuclei were counterstained with Hoechst 33342 dye. Scale bar: 20  $\mu$ m.
