# Supplementary material for: Solid-phase reverse transfection for intracellular delivery of functionally active proteins
Source: HighWire-hosted journal article supplement (doi:10.1101/gr.215103.116), 2017-09-05
Supplement: Supplemental_Fig_S3.pdf [file Supplemental_Fig_S3.pdf]

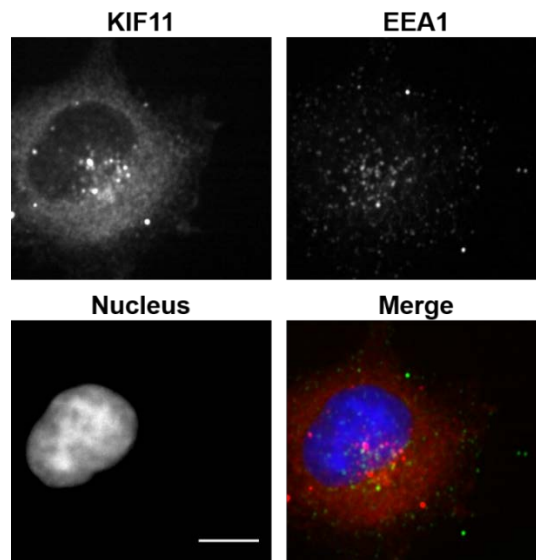

**Supplemental Figure S3** Co-localization of solid-phase reverse transfected anti-KIF11 antibody (labeled with Alexa Fluor® 647; red) and early endosomes (green) in HeLa cells. The nucleus was counterstained with Hoechst 33342 (blue). The anti-KIF11 antibody was transfected using the condition VIII and Lipofectamine®RNAiMAX (Supplemental Table S1). The transfection was performed in 384-well plates. Cells were trypsinized 2 hours post transfection, seeded to a mock-coated 384-well plate and fixed after another 4 hours of incubation. Scale bar: 10  $\mu$ m.
