# Supplementary material for: Solid-phase reverse transfection for intracellular delivery of functionally active proteins
Source: HighWire-hosted journal article supplement (doi:10.1101/gr.215103.116), 2017-09-05
Supplement: Supplemental_Fig_S4.pdf [file Supplemental_Fig_S4.pdf]

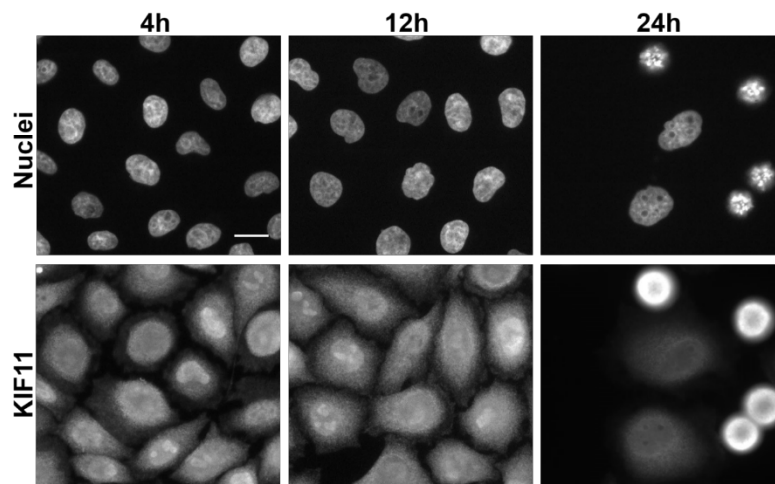

**Supplemental Figure S4** Localization changes of KIF11 protein following depletion of *KIF11* mRNA by RNAi after varying time points (lower row). KIF11 localization was determined by immunofluorescent staining of HeLa cells. Nuclei were counterstained with Hoechst 33342 dye (upper row). Scale bar: 20  $\mu$ m.
