# Supplementary material for: Solid-phase reverse transfection for intracellular delivery of functionally active proteins
Source: HighWire-hosted journal article supplement (doi:10.1101/gr.215103.116), 2017-09-05
Supplement: Supplemental_Fig_S5.pdf [file Supplemental_Fig_S5.pdf]

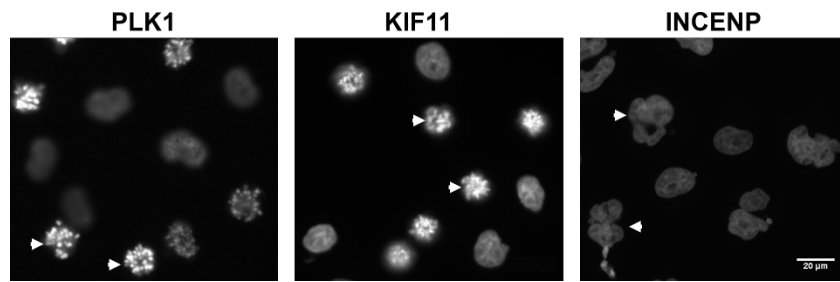

**Supplemental Figure S5** Example phenotypes when the expression level of PLK1, KIF11 and INCENP is reduced in HeLa cells. The transfection of siRNAs was performed in 384-well plates and cells were incubated for 24 hours post transfection. Nuclei were counterstained with Hoechst 33342 dye. Scale bar: 20  $\mu$ m. Examples of the typical phenotypes are indicated by arrows.
