# Supplementary material for: Solid-phase reverse transfection for intracellular delivery of functionally active proteins
Source: HighWire-hosted journal article supplement (doi:10.1101/gr.215103.116), 2017-09-05
Supplement: Supplemental_Fig_S7.pdf [file Supplemental_Fig_S7.pdf]

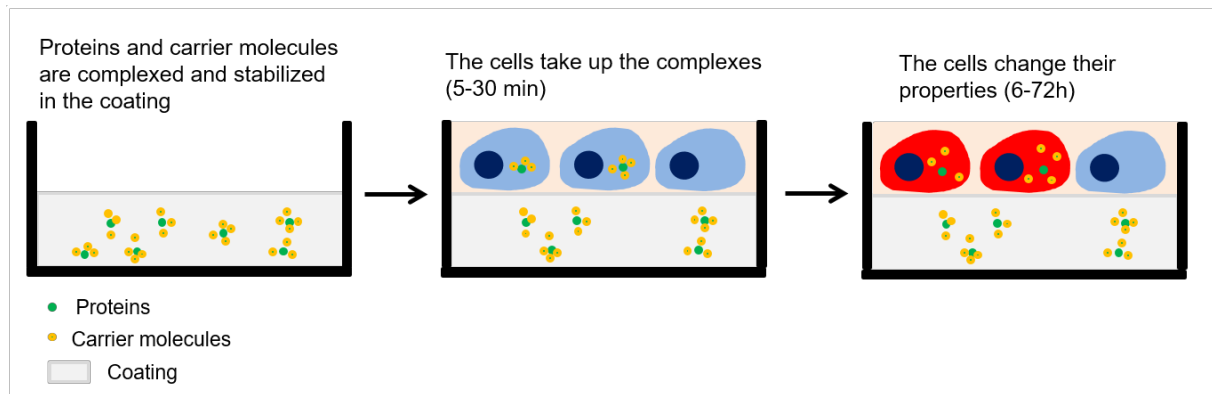

**Supplemental Figure S7** Basic principle of solid-phase reverse transfection. The biomolecules (DNA, siRNA or proteins) are mixed with a transfection solution and applied on a carrier surface, then dried and overlaid with mammalian cells. The cells take up the biomolecules and change their properties.
