# Supplementary material for: Solid-phase reverse transfection for intracellular delivery of functionally active proteins
Source: HighWire-hosted journal article supplement (doi:10.1101/gr.215103.116), 2017-09-05
Supplement: Supplemental_Methods.pdf [file Supplemental_Methods.pdf]

## Table of contents

|                                                                                |        |
|--------------------------------------------------------------------------------|--------|
| Supplemental Material and Methods                                              | Page 1 |
| Preparation of the transfection solutions                                      | Page 1 |
| Cell numbers for transfection and incubation times (37°C, 5% CO <sub>2</sub> ) | Page 3 |
| gRNA target sequences and PCR primer sequences                                 | Page 4 |
| Antibodies                                                                     | Page 5 |

## Supplemental Material and Methods

### Preparation of the transfection solutions

#### Antibodies:

*GM130 Alexa Fluor® 647 (#558712, BD Biosciences)*

2 µg (1 mg/mL) antibody were complexed together with 1.25 µL Lipofectamine®3000 (Invitrogen) transfection reagent in 2.50 µL OptiMEM, containing 1.82 M trehalose dihydrate, for 5 minutes. Then 3.625 µL of a 1 mg/mL collagen type IV solution in ddH<sub>2</sub>O, (#C5533, Sigma-Aldrich) were added to get a total volume of the transfection solution of 9.375 µL.

*alpha tubulin (#3873, Cell Signaling Technology); KIF11 (#ABT149, Merck Millipore); KIF11 (#AP9097a, Abgent); negative control: Anti-rabbit IgG Cy3® (#A10520; Thermo Fisher Scientific)*

2 µg (1 mg/mL) antibody were complexed together with 2.25 µL Lipofectamine®RNAiMAX (Invitrogen) transfection reagent in 1.50 µL OptiMEM, containing 1.82 M trehalose dihydrate, for 5 minutes. Then 3.625 µL of a 1 mg/mL collagen type IV solution in ddH<sub>2</sub>O, (#C5533, Sigma-Aldrich) were added to get a total volume of the transfection solution of 9.375 µL.

#### GFP:

*Green fluorescent protein (#ab84191, abcam)*

1 µg (1 mg/mL) GFP was complexed together with 0.50 µL Lipofectamine®RNAiMAX (Invitrogen) transfection reagent in 4.25 µL OptiMEM, containing 1.82 M trehalose dihydrate, for 5 minutes. Then 3.625 µL of a 1 mg/mL collagen type IV solution in ddH<sub>2</sub>O, (#C5533, Sigma-Aldrich) were added to get a total volume of the transfection solution of 9.375 µL.

#### siRNA:

*KIF11 Silencer Select siRNA (#S7903, ambion), Silencer® Select Negative Control No. 1 (#4390844, ambion)*

7.5 pmol (30 µM) siRNA were complexed together with 1.25 µL Lipofectamine®RNAiMAX (Invitrogen) transfection reagent in 2.00 µL OptiMEM, containing 1.82 M trehalose dihydrate, for 5 minutes. Then 3.625 µL of a 1 mg/mL collagen type IV solution in  $\text{ddH}_2\text{O}$ , (#C5533, Sigma-Aldrich) were added to get a total volume of the transfection solution of 9.375 µL.

#### cDNA:

*CRISPR all-in-one cDNA (Sigma-Aldrich): PLK1 (HS0000306668); KIF11 (HS0000296443); INCENP (HS0000074011)*

350 ng cDNA (350 ng/µL) were complexed together with 1.25 µL TransIT-X2® (Mirus Bio) transfection reagent in 3.50 µL OptiMEM, containing 1.82 M trehalose dihydrate, for 5 minutes. Then 3.625 µL of a 1 mg/mL collagen type IV solution in  $\text{ddH}_2\text{O}$ , (#C5533, Sigma-Aldrich) were added to get a total volume of the transfection solution of 9.375 µL.

#### Simultaneous co-transfection of Cas9 recombinant protein together with gRNA:

*CRISPR gRNA (Sigma-Aldrich): PLK1 (HS0000306668); KIF11 (HS0000296443); INCENP (HS0000074011); non-targeting control (no sequence information available; Gene: CRISPR06, lot number: 06251514MN); recombinant Cas9 nuclease NLS (S. pyogenes; #M0641; New England Biolabs)*

40 ng gRNA (40 ng/µL) were pre-incubated with 160 ng (160 ng/µL) of recombinant Cas9 nuclease at RT for 5 minutes. This mix was complexed together with 0.75 µL Lipofectamine®3000 (Invitrogen) transfection reagent in 3.00 µL OptiMEM, containing 1.82 M trehalose dihydrate, for 5 minutes. Then 3.625 µL of a 1 mg/mL collagen type IV solution in  $\text{ddH}_2\text{O}$ , (#C5533, Sigma-Aldrich) were added to get a total volume of the transfection solution of 9.375 µL.

#### Mock-coating:

1.50 µL OptiMEM, containing 1.82 M trehalose dihydrate, 4.25 µL  $\text{ddH}_2\text{O}$  and 3.625 µL of a 1 mg/mL collagen type IV solution in  $\text{ddH}_2\text{O}$ , (#C5533, Sigma-Aldrich) were added to a well of a 384-multiwell plate to get a total volume of 9.375 µL.

**Cell numbers for transfection and incubation times (37°C, 5% CO<sub>2</sub>)**

|                                                         | HeLa                                           | HEK293T                     |
|---------------------------------------------------------|------------------------------------------------|-----------------------------|
| <b>Antibodies</b>                                       |                                                |                             |
| <i>GM130</i> Alexa Fluor® 647                           | 3.200 cells/80 µL; 20 hours/4 hours            |                             |
| <i>alpha tubulin</i>                                    | 3.200 cells/80 µL; 2 hours/4 hours             |                             |
| <i>KIF11</i> (IF)<br><i>KIF11</i> Alexa Fluor® 647 (IF) | 3.200 cells/80 µL; 2 hours/4 hours             |                             |
| <i>KIF11</i> (phenotype experiment)                     | 1.400 cells/80 µL; 24 hours                    |                             |
| Anti-rabbit IgG Cy3® (negative control)                 | 1.400 cells/80 µL; 24 hours                    |                             |
| <b>Protein</b>                                          |                                                |                             |
| GFP                                                     | 1.400 cells/80 µL; 24 hours                    |                             |
| <b>siRNA</b>                                            |                                                |                             |
| <i>KIF11</i> , negative control                         | 1.400 cells/80 µL; 24 hours                    |                             |
| <b>cDNA</b>                                             |                                                |                             |
| <i>PLK1/KIF11/INCENP</i>                                | 800 cells/80 µL; 50 hours                      | 3.000 cells/80 µL; 50 hours |
| <b>rec. Cas9 + gRNA</b>                                 |                                                |                             |
| <i>PLK1/KIF11/INCENP</i>                                | 800 cells/80 µL; 50 hours                      | 3.000 cells/80 µL; 50 hours |
| <b>Lentiviral transduction</b>                          |                                                |                             |
| <i>PLK1/KIF11/INCENP</i>                                | 300 cells/80 µL;<br>72 hours post transduction |                             |

# gRNA target sequences and PCR primer sequences

| Gene                                   | Target sequence                                                                                      | Primer sequences                                             |
|----------------------------------------|------------------------------------------------------------------------------------------------------|--------------------------------------------------------------|
| <i>PLK1</i><br>(HS0000306668)          | TCGGACGCGGACACCAAGGAGG                                                                               | fw:<br>GCTTTTGTAACGTTCCCAGC<br>rv:<br>TAGCGTCCATTACCAGCACC   |
| <i>KIF11</i><br>(HS0000296443)         | CCTAATGAAGAGTATACCTGGG                                                                               | fw:<br>ACTGTGCCTGGCTTGTTTTTTG<br>rv:<br>CTTCAATACAAAGCCCTCCC |
| <i>INCENP</i><br>(HS0000074011)        | CCGACGGAAGAAGAGACGGATT                                                                               | fw:<br>GGGCTCCCTGCTGTATACTG<br>rv:<br>CAAAGCCGTACTGCTCTGCT   |
| Non-targeting<br>negative control<br># | <i>no sequence information available;</i><br><i>Gene: CRISPR06, lot number:</i><br><i>06251514MN</i> |                                                              |

**Antibodies/GFP**

| Antibody                          | Species                                  | #                                                                                             | Manufacturer                 |
|-----------------------------------|------------------------------------------|-----------------------------------------------------------------------------------------------|------------------------------|
| <i>GM130</i> Alexa Fluor® 647     | mouse                                    | 558712;<br>Custom<br>formulation<br>without BSA                                               | BD Biosciences               |
| <i>alpha tubulin</i>              | mouse                                    | 3873                                                                                          | Cell Signaling<br>Technology |
| <i>KIF11</i>                      | rabbit                                   | ABT149;<br>Lot: 2606356;<br>Lot: 2702413<br>(Labeled to Alexa<br>Fluor® 647);<br>Lot: 2851238 | Merck Millipore              |
| <i>KIF11</i>                      | rabbit                                   | AP9097a                                                                                       | Abgent                       |
| <i>EEA1</i>                       | mouse                                    | 610456                                                                                        | BD Biosciences               |
| Anti-mouse IgG<br>AlexaFluor® 488 | goat                                     | A11029                                                                                        | Thermo Fisher<br>Scientific  |
| Anti-rabbit IgG Cy3®              | goat                                     | A10520                                                                                        | Thermo Fisher<br>Scientific  |
| Green fluorescent<br>protein      | Aequorea victoria;<br>produced in E.coli | ab84191                                                                                       | Abcam                        |
