# Supplementary material for: Solid-phase reverse transfection for intracellular delivery of functionally active proteins
Source: HighWire-hosted journal article supplement (doi:10.1101/gr.215103.116), 2017-09-05
Supplement: Supplemental_Table_S1.pdf [file Supplemental_Table_S1.pdf]

| Optimization matrix             | I    | II   | III  | IV   | V    | VI   | VII  | VIII |
|---------------------------------|------|------|------|------|------|------|------|------|
| Transfection reagent [ $\mu$ L] | 0.50 | 0.50 | 0.75 | 0.75 | 1.25 | 1.25 | 2.25 | 2.25 |
| Antibody/GFP [ $\mu$ g]         | 1.00 | 2.00 | 1.00 | 2.00 | 1.00 | 2.00 | 1.00 | 2.00 |

**Supplemental Table S1** Optimization matrix for solid-phase reverse protein transfection. Two transfection reagents Lipofectamine®3000 and Lipofectamine®RNAiMAX were used. The transfection mixtures were prepared in a low volume 384-well plate (for details see Methods).
