# Supplementary material for: Solid-phase reverse transfection for intracellular delivery of functionally active proteins
Source: HighWire-hosted journal article supplement (doi:10.1101/gr.215103.116), 2017-09-05
Supplement: Supplemental_Table_S2.pdf [file Supplemental_Table_S2.pdf]

|                    | I                  | II                 | III                | IV                 |
|--------------------|--------------------|--------------------|--------------------|--------------------|
| RNAiMAX Merck      | 0.78% $\pm$ 0.23%  | 1.19% $\pm$ 0.52%  | 5.11% $\pm$ 1.87%  | 12.24% $\pm$ 4.05% |
| RNAiMAX Abgent     | 0.20% $\pm$ 0.24%  | 0.19% $\pm$ 0.17%  | 0.20% $\pm$ 0.18%  | 0.33% $\pm$ 0.29%  |
|                    | V                  | VI                 | VII                | VIII               |
| RNAiMAX Merck      | 14.97% $\pm$ 1.52% | 16.87% $\pm$ 0.48% | 36.96% $\pm$ 6.05% | 39.89% $\pm$ 3.10% |
| RNAiMAX Abgent     | 0.15% $\pm$ 0.27%  | 0.25% $\pm$ 0.32%  | 0.25% $\pm$ 0.28%  | 0.24% $\pm$ 0.09%  |
|                    | I                  | II                 | III                | IV                 |
| Lipof. 3000 Merck  | 0.51% $\pm$ 0.16%  | 0.62% $\pm$ 0.08%  | 0.26% $\pm$ 0.10%  | 0.17% $\pm$ 0.08%  |
| Lipof. 3000 Abgent | 0.31% $\pm$ 0.14%  | 0.24% $\pm$ 0.08%  | 0.33% $\pm$ 0.21%  | 0.39% $\pm$ 0.08%  |
|                    | V                  | VI                 | VII                | VIII               |
| Lipof. 3000 Merck  | 0.56% $\pm$ 0.14%  | 0.22% $\pm$ 0.01%  | 0.46% $\pm$ 0.11%  | 0.98% $\pm$ 0.57%  |
| Lipof. 3000 Abgent | 0.19% $\pm$ 0.19%  | 0.32% $\pm$ 0.17%  | 0.29% $\pm$ 0.25%  | 0.38% $\pm$ 0.33%  |

**Supplemental Table S2** Phenotype incidences obtained after solid-phase transfection of two KIF11 antibodies (Merck and Abgent) in HeLa cells, complexed with Lipofectamine®RNAiMAX or Lipofectamine®3000. The transfections were performed in 384-well plates. Cells were fixed 24 hours post transfection. Phenotype analysis and quantification was performed as described in Methods.
