# Supplementary material for: Solid-phase reverse transfection for intracellular delivery of functionally active proteins
Source: HighWire-hosted journal article supplement (doi:10.1101/gr.215103.116), 2017-09-05
Supplement: Supplemental_Table_S3.pdf [file Supplemental_Table_S3.pdf]

|                   | Solid-phase | Solid-phase      | Solid-phase   |         | Liquid-phase  |         |
|-------------------|-------------|------------------|---------------|---------|---------------|---------|
|                   | anti-rabbit | negative-control | non-targeting |         | non-targeting |         |
|                   | IgG         | siRNA            | gRNA          |         | gRNA          |         |
|                   | HeLa        | HeLa             | HeLa          | HEK293T | HeLa          | HEK293T |
| <i>PLK1/KIF11</i> | 0.25% ±     | 0.54% ±          | 0.36% ±       | 0.18% ± | 0.12% ±       | 0.27% ± |
|                   | 0.22%       | 0.27%            | 0.16%         | 0.04%   | 0.05%         | 0.01%   |
| <i>INCENP</i>     |             |                  | 0.48% ±       | 0.23% ± | 0.20% ±       | 0.39% ± |
|                   |             |                  | 0.02%         | 0.03%   | 0.04%         | 0.06%   |

**Supplemental Table S3** Phenotype incidences of the three target genes after solid-phase reverse and liquid-phase transfection of a negative control antibody, negative control siRNA and negative control gRNA, respectively. Cells were fixed 24 hours post transfection (anti-rabbit IgG and negative control siRNA) or 48 hours post transfection (non-targeting gRNA). Phenotype analysis and quantification was performed as described in Methods.
