# Supplementary material for: Solid-phase reverse transfection for intracellular delivery of functionally active proteins
Source: HighWire-hosted journal article supplement (doi:10.1101/gr.215103.116), 2017-09-05
Supplement: Supplemental_Table_S4.pdf [file Supplemental_Table_S4.pdf]

| Cell line | Target        | Type of transfection          | Gene editing (indel) | Phenotype rate     |
|-----------|---------------|-------------------------------|----------------------|--------------------|
| HeLa      | <i>PLK1</i>   | Solid-phase rec. Cas9 + gRNA  | 24.3%                | 4.75% $\pm$ 0.47%  |
|           | <i>PLK1</i>   | All-in-one cDNA               | 17.6%                | 8.33% $\pm$ 1.54%  |
|           | <i>PLK1</i>   | Lentiviral particles          | 19.7%                | 9.26% $\pm$ 0.94%  |
|           | <i>PLK1</i>   | Liquid-phase rec. Cas9 + gRNA | 12.2%                | 1.84% $\pm$ 0.07%  |
|           | <i>KIF11</i>  | Solid-phase rec. Cas9 + gRNA  | 21.7%                | 8.85% $\pm$ 1.33%  |
|           | <i>KIF11</i>  | All-in-one cDNA               | 18.1%                | 11.23% $\pm$ 1.65% |
|           | <i>KIF11</i>  | Lentiviral particles          | 14.2%                | 5.32% $\pm$ 0.40%  |
|           | <i>KIF11</i>  | Liquid-phase rec. Cas9 + gRNA | 7.8%                 | 2.63% $\pm$ 0.44%  |
|           | <i>INCENP</i> | Solid-phase rec. Cas9 + gRNA  | 15.3%                | 5.13% $\pm$ 0.31%  |
|           | <i>INCENP</i> | All-in-one cDNA               | 14.7%                | 3.85% $\pm$ 0.52%  |
|           | <i>INCENP</i> | Lentiviral particles          | 12.6%                | 4.77% $\pm$ 0.76%  |
|           | <i>INCENP</i> | Liquid-phase rec. Cas9 + gRNA | 4.5%                 | 1.32% $\pm$ 0.36%  |
| HEK293T   | <i>PLK1</i>   | Solid-phase rec. Cas9 + gRNA  | 25.1%                | 10.42% $\pm$ 0.74% |
|           | <i>PLK1</i>   | All-in-one cDNA               | 18.8%                | 14.58% $\pm$ 1.49% |
|           | <i>PLK1</i>   | Liquid-phase rec. Cas9 + gRNA | 17.1%                | 6.22% $\pm$ 0.82%  |
|           | <i>KIF11</i>  | Solid-phase rec. Cas9 + gRNA  | 25.6%                | 9.01% $\pm$ 0.44%  |
|           | <i>KIF11</i>  | All-in-one cDNA               | 18.7%                | 7.66% $\pm$ 1.30%  |
|           | <i>KIF11</i>  | Liquid-phase rec. Cas9 + gRNA | 23.3%                | 9.92% $\pm$ 0.13%  |
|           | <i>INCENP</i> | Solid-phase rec. Cas9 + gRNA  | 15.0%                | 2.79% $\pm$ 0.22%  |
|           | <i>INCENP</i> | All-in-one cDNA               | 15.3%                | 4.78% $\pm$ 0.68%  |
|           | <i>INCENP</i> | Liquid-phase rec. Cas9 + gRNA | 15.0%                | 1.48% $\pm$ 0.30%  |

**Supplemental Table S4** Gene editing efficiencies as produced indels and phenotype incidences. The transfections were performed in 384-well plates (solid-phase reverse transfection of rec. Cas9 + gRNA as well as all-in-one cDNA) and in 96-well plates (liquid-phase transfection of rec. Cas9 + gRNA). For the HeLa cell line, the indel and phenotype incidences that were produced after lentiviral transduction of the CRISPR all-in-one constructs are also shown. The transductions were performed in 384-well plates. Cells were fixed or lysed 48 hours post transfection or transduction, respectively, followed by PCR target amplification and genomic cleavage detection assay. Phenotype analysis and quantification were performed as described in Methods.
